# Supplementary material
Source: MDPI journal article supplement (https://www.mdpi.com/2073-4344/12/12/1636)
Supplement: s1 [file s1]

# Supplementary Materials

## Evaluation of Structural and Functional Properties of $\text{La}_{0.6}\text{Sr}_{0.4}\text{MnO}_3$ Perovskite Prepared by the Fast Solution Combustion Approach

Ramón Cobo Rendón <sup>1,\*</sup>, Christopher Salvo <sup>2</sup>, Erwin Sepúlveda <sup>1</sup>, Arunachalam Arulraj <sup>3,4</sup>, Felipe Sanhueza <sup>1</sup>, José Jiménez Rodríguez <sup>5</sup> and Ramalinga Viswanathan Mangalaraja <sup>1,4,\*</sup>

<sup>1</sup> Advanced Ceramics and Nanotechnology Laboratory, Department of Materials Engineering, Faculty of Engineering, University of Concepcion, Concepcion 4030000, Chile

<sup>2</sup> Department of Mechanical Engineering, Faculty of Engineering, Universidad del Bío-Bío, Concepción 4030000, Chile

<sup>3</sup> Departamento de Física, Facultad de Ciencias Naturales, Universidad de Atacama, Copiapó 1530000, Chile

<sup>4</sup> Faculty of Engineering and Sciences, Universidad Adolfo Ibáñez, Diagonal las Torres 2640, Peñalolén, Santiago 1030000, Chile

<sup>5</sup> National Center for Metallurgical Research, Superior Council of Scientific Investigations (CENIM-CSIC), X-ray Laboratory, 28040 Madrid, Spain

\* Correspondence: rcobo@udec.cl (R.C.R.); mangal@uai.cl (R.V.M.)

## Results and discussion:

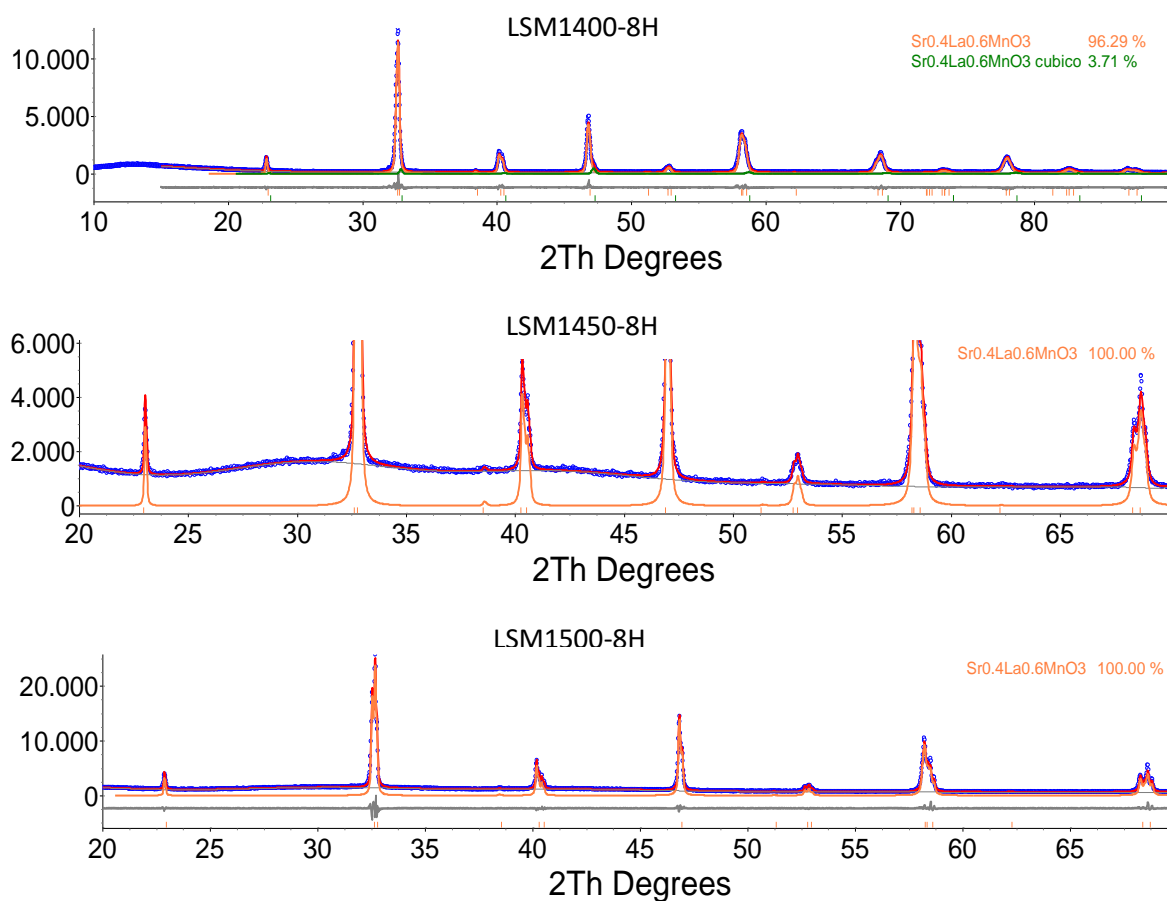

**Figure S1.** Rietveld refinement of XRD patterns of  $\text{La}_{0.6}\text{Sr}_{0.4}\text{MnO}_3$  by considering only the rhombohedral R-3c (indicated in red) and also the cubic Pm-3m polymorphs (indicated in green). The difference between experimental data and the fitted simulated pattern is plotted as a continuous gray line at the bottom. (Blue open circles: Experimental data; Green solid line: Cubic phase; Orange solid line: Rhombohedral phase; Red solid line: Fitted data).

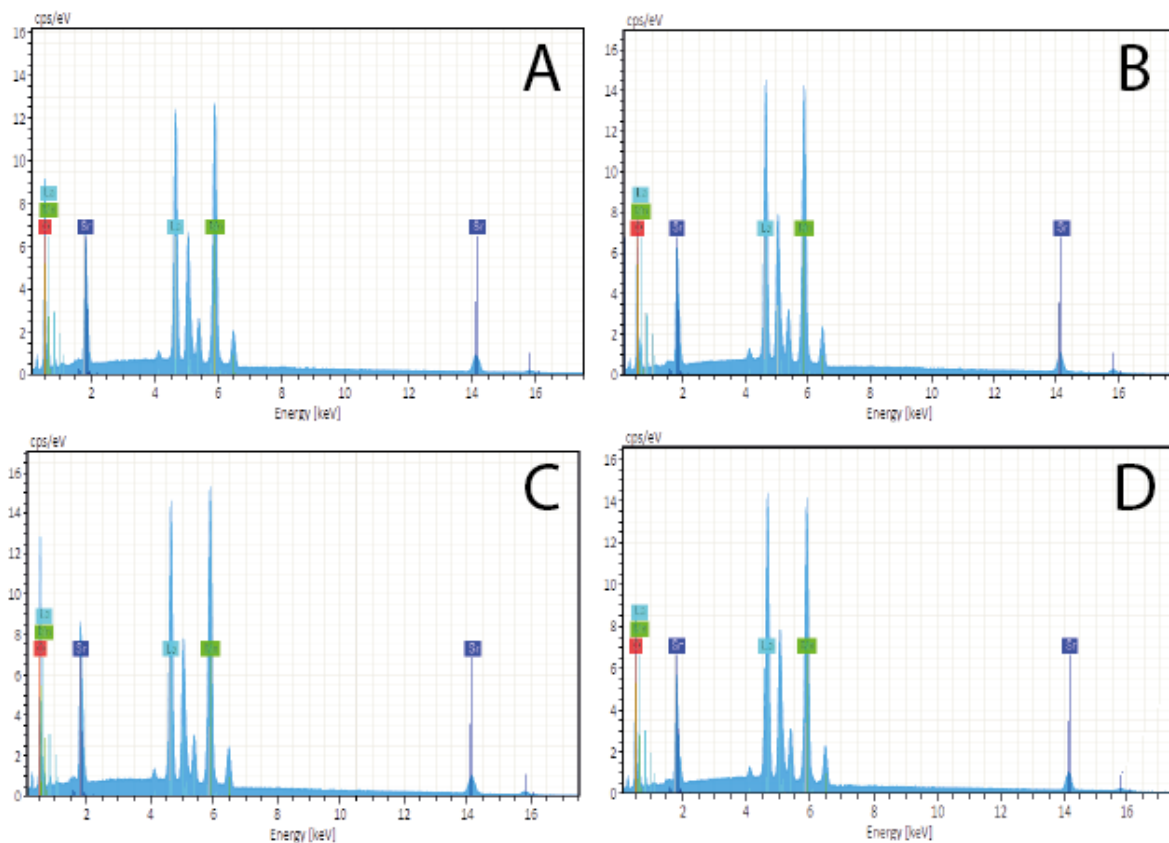

**Figure S2.** EDS Mapping of the combusted and calcined LSM powders (A) LSM500, (B) LSM1400, (C) LSM1450, (D) LSM1500.
